# Supplementary material for: Plasmodium Secretion Induces Hepatocyte Lysosome Exocytosis and Promotes Parasite Entry
Source: PubMed Central journal article supplement — iScience. 2019 Oct 31;21:603–11. doi: 10.1016/j.isci.2019.10.054 (PMC6889558; doi:10.1016/j.isci.2019.10.054), 2019-10-31
Supplement: mmc1.pdf [file mmc1.pdf]

ISCI, Volume 21

## Supplemental Information

### ***Plasmodium* Secretion Induces Hepatocyte**

### **Lysosome Exocytosis and Promotes Parasite Entry**

**Kamalakaran Vijayan, Igor Cestari, Fred D. Mast, Elizabeth K.K. Glennon, Suzanne M. McDermott, Heather S. Kain, Alyssa M. Brokaw, John D. Aitchison, Kenneth Stuart, and Alexis Kaushansky**

## 1 **Transparent Methods**

### 2 **Cell lines and culture**

3 Hepa1-6 cells were obtained from American Type Culture Collection. Cells were maintained in  
4 DMEM-Complete Medium (Dulbecco's modified eagle medium (Cellgro, Manassas, VA),  
5 supplemented with 10% FBS (Sigma-Aldrich, St. Louis, MO), 10000 IU/ml penicillin, 100 mg/ml  
6 streptomycin (Cellgro), 2.5 mg/ml fungizone (HyClone/Thermo Fisher, Waltham, MA) and 4 mM  
7 L-Glutamine (Cellgro). Cells were split 2-3 times weekly. All experiments were performed using  
8 Hepa1-6 cells that were passaged between 4 and 20 times after purchase from ATCC.

### 9 **Mosquito rearing and sporozoite production**

10 For *P. yoelii* sporozoite production, female 6–8-week-old Swiss Webster mice (Harlan,  
11 Indianapolis, IN) were injected with blood stage *P. yoelii* (17XNL) parasites to begin the growth  
12 cycle. Animal handling was conducted according to the Institutional Animal Care and Use  
13 Committee-approved protocols. *Anopheles stephensi* mosquitoes were allowed to feed on infected  
14 mice after gametocyte exflagellation was observed. Salivary gland sporozoites were isolated using  
15 a standard protocol at day 14 or 15 post-blood meal. The sporozoites were activated with 20% FBS  
16 and spun at 1000 x g to remove debris from salivary gland. Spin sporozoites at 15,000 x g for 4 min  
17 at 4°C to pellet and resuspend in the desired volume of complete medium.

### 18 ***T. gondii* production**

19 *T. gondii* strain RHΔHXGPRT Gra2:GFP, Tub:βgal, a kind gift from Marilyn Parsons (CIDR,  
20 Seattle), was maintained by continual cycling through human foreskin fibroblasts (HFF). For

21 infections, parasites were lysed from HFFs by passing 2× through a 27-gauge needle and then  
22 counted on a hemocytometer.

### 23 ***T. cruzi* production and labeling**

24 Tissue culture-derived trypomastigotes from the *T. cruzi* Cl Brener strain were obtained by weekly  
25 passage in confluent monolayers of Hepa1-6 cells at 37 °C and 5% CO<sub>2</sub>, in DMEM medium  
26 supplemented with 10% FBS. Motile trypomastigotes were obtained from the supernatant and  
27 purified as previously described (Schenkman et al., 1991) and stained with 5(6)-  
28 Carboxyfluorescein diacetate N-succinimidyl ester (Sigma Aldrich) as suggested by  
29 manufacturer's protocol.

### 30 **shRNA-mediated gene knockdown**

31 MISSION shRNA vectors for SNAP23, VAMP7, SYT7 and SYN4 were obtained from Sigma  
32 Aldrich (St. Louis, MO). Non-replicating lentiviral stocks were generated by transfection of  
33 HEK293-FT cells. 4 × 10<sup>6</sup> HEK293-FT cells were plated on poly-L-lysine coated dishes to achieve  
34 70-80% confluency at time of transfection. Approximately 24 h after plating, transfection mixtures  
35 were prepared by mixing 20 µL Polyethylenimine MAX (Polysciences Inc, Warrington, PA)  
36 prepared at 1 mg/ml, together with 4.75 µg of shRNA construct or a scramble shRNA control, 1.5  
37 µg viral envelope plasmid (pCMV-VSV-G), and 3.75 µg viral packaging plasmid (psPax2). After  
38 incubating for 10 min at room temp in DMEM, transfection complexes were added drop-wise to  
39 cells. After overnight incubation, cells were washed to remove transfection mixtures and were fed  
40 with 10 mL fresh media. Lentivirus-containing supernatant was harvested 36 hours later, passed  
41 through 0.45 µm syringe filters, and either used immediately for transduction or stored at -80 °C.

42 To induce knockdown of candidate SNARE proteins, Hepa1-6 cells were transduced with  
43 lentiviral supernatants in 6-well plates at a cell density of  $1 \times 10^6$  per well. At time of plating, cells  
44 were transduced with 1 mL of supernatant in the presence of 0.5  $\mu\text{g}/\text{mL}$  polybrene (Sigma Aldrich  
45 St. Louis, MO). In order to select for cells with stable integration of shRNA transgenes, supernatant  
46 was replaced with complete media with the addition of 2  $\mu\text{g}/\text{mL}$  puromycin 24 h post-transduction,  
47 and cells were selected for at least 5 days prior to experiments.

#### 48 **Validation and quantification of shRNA mediated knockdown**

49 Total RNA was extracted using TRIzol reagent according to the manufacturer's procedure  
50 (Invitrogen). cDNA synthesis was performed using the Thermo Scientific RevertAid RT Kit  
51 according to the manufacturer's instructions (Thermo Scientific). For quantitative PCR (qPCR) a  
52 standard curve was generated using 1:4 dilutions of a reference cDNA sample for PCR  
53 amplification of all target PCR products using target specific primers (Table S1). The values of  
54 each transcript were normalized to mouse GAPDH. Experimental samples were compared to this  
55 standard curve to give a relative abundance of transcript.

#### 56 **Infection assays**

57  $5 \times 10^5$  Hepa1-6 wild type cells or knockdowns cells were seeded in each well of a 24-well plate  
58 (Corning) and infected with *P. yoelii* sporozoites at a multiplicity of infection (MOI) = 0.25,  
59 *Toxoplasma gondii* tachyzoites (MOI = 0.5) or *Trypanosoma cruzi* trypomastigotes (MOI = 5) for  
60 90 min. For small molecule treatment experiments, Hepa1-6 cells were treated with or without 10  
61  $\mu\text{M}$  ionomycin, 400 nM thapsigargin, 10  $\mu\text{M}$  brefeldin A, 10  $\mu\text{M}$  nocodazole and 5mM methyl- $\beta$ -  
62 cyclodextrin (M $\beta$ CD) for 15 min, washed and infected for 90 min. For cholesterol replenishment,  
63 M $\beta$ CD treated cells were washed and incubated with 1 mM cholesterol for 15 min before parasite

64 addition. Cells were stained with Live/Dead marker after 60 mins of infection as per  
65 manufacturer's instruction (ThermoFischer). After 90 min of infection, cells were harvested with  
66 accutase (Life technologies) and fixed with Cytoperm/Cytofix (BD Biosciences). Cells were  
67 blocked with Perm/Wash (BD Biosciences) + 2% BSA for one hour at room temperature then  
68 stained overnight at 4 °C with primary antibody. Cells were washed three times with PBS then  
69 stained for one hour at room temperature with secondary antibodies. The cells were then washed  
70 and resuspended in PBS + 5 mM EDTA. Infection rate was measured by flow cytometry on an  
71 LSRII (Becton-Dickinson) and analyzed by FlowJo (Tree Star). Surface LAMP-1 levels were  
72 calculated using mean fluorescent intensity of specific population in FlowJo and represented as  
73 fold change between infected and control population.

74 For the evaluation of surface expression of LAMP-1, cells were detached using Accutase (Sigma)  
75 and were incubated with a polyclonal antibody to LAMP1 (DSHB) in medium + 2% BSA for 30  
76 minutes in ice, fixed with 3.7% paraformaldehyde, permeabilized with 0.01% Triton X-100. Cells  
77 were then stained with monoclonal antibody to *P. yoelii* Circumsporozoite protein (CSP)  
78 conjugated to AlexaFluor 488 (Life Technologies) at 1:500, *T. gondii* P30 mouse monoclonal  
79 antibody at 1:1000 (Novus Biologicals). Cells were washed three times with PBS then stained for  
80 one hour at room temperature with secondary antibodies. The cells were washed and suspended in  
81 PBS+5 mM EDTA. Infection rate and surface expression of LAMP1 was measured by flow  
82 cytometry on an LSRII (Becton-Dickinson) and analyzed by FlowJo (Tree Star).

### 83 **3D Fluorescence Microscopy**

84 For imaging experiments, Hepa1-6 cells were plated in 8 well chamber slides (Labtek) and infected  
85 with *P. yoelii* wild type or SPECT2<sup>-</sup> sporozoites. Cells were fixed with 10% formalin (Sigma) at

86 defined timepoints after infection (5, 30, 60, or 90 min), permeabilized with Triton X-100, and  
87 stained with rabbit anti-EEA1 (CST), rabbit anti-Rab5 (CST), rabbit anti-Rab7 (CST), rabbit anti-  
88 Rab11 (CST), rat anti-LAMP1 (DSHB), goat anti-UIS4 (SCIGEN) and mouse anti-CSP  
89 antibodies. Nuclei were stained with DAPI (Vectashield) and AlexaFluor 647-phalloidin (Life  
90 technologies) was used for actin visualization. Images were acquired with a 100× 1.4 NA objective  
91 (Olympus) on a DeltaVision Elite High Resolution Microscope (GE Healthcare Life Sciences).  
92 The sides of each pixel represent  $64.5 \times 64.5$  nm and z-stacks were acquired at 300 nm intervals.  
93 Approximately 20-30 slices were acquired per image stack. For deconvolution, the 3D data sets  
94 were processed to remove noise and reassign blur by an iterative Classic Maximum Likelihood  
95 Estimation widefield algorithm provided by Huygens Professional Software (Scientific Volume  
96 Imaging BV, The Netherlands).

### 97 **Image analysis and quantification**

98 Imaris software (Bitplane) was used to obtain 3D reconstructions of the fluorescence microscopy  
99 image stacks and quantification of lysosomes in x-y-z coordinates. Deconvolved images of  
100 immunostained cells stained with anti-LAMP1 (lysosomes) anti-CSP (sporozoites) and phalloidin  
101 (actin) with DAPI (nucleus) were processed, thresholded and segmented by Imaris software, to  
102 render isospots and isosurfaces from the fluorescence signal (Real and Mortara, 2012). Phalloidin  
103 channel was used for the 3D reconstruction of the cells and only the sporozoites encased inside the  
104 3D phalloidin structure are considered as invaded sporozoites and proceeded further. Isosurfaces  
105 were constructed by extrapolating the DAPI signal to the local minima (Cortez et al., 2016) in  
106 order to define a perinuclear region where lysosomes can be differentially counted. Using a mask  
107 tool, all LAMP1 signal outside this nuclear/perinuclear isosurface was suppressed, allowing  
108 addition of a new LAMP1 fluorescence channel corresponding exclusively to LAMP1 localized

109 in perinuclear area. After image processing, we obtained an unmasked LAMP1 signal  
110 corresponding to total lysosomes and a masked LAMP1 signal localized to the perinuclear region,  
111 corresponding to perinuclear lysosomes. Isospots were constructed based on these two classes of  
112 LAMP1 signal, which allowed the quantification of total and perinuclear lysosomes per cell for  
113 each image-stack. The surface segmentation function of Imaris was used to identify the cell  
114 boundary using phalloidin-signal. Intensity based co-localization was performed by creating  
115 region of interest (ROI) specific to the sporozoite structure in the CSP channel using the Imaris  
116 isosurface module. Pearson's correlation coefficient for co-localization analysis of endocytic  
117 vesicles and CSP was performed in the ROI using the Imaris co-localization module.

#### 118 **Generation of sporozoite supernatant**

119 Salivary gland sporozoites were isolated using standard protocols. Sporozoites incubated with 20%  
120 FBS for 20 min at RT and spun at 13,0000 x g for 4 min at 4 °C. The supernatant is collected and  
121 again spun at 13, 0000 x g for 4 min at 4 °C to ensure the preparation is free of intact sporozoites.  
122 Hepa1-6 cells were exposed to supernatants at different sporozoite to hepatocyte ratio for 90 min.  
123 Cells were washed and subjected to 3D immunofluorescence microscopy or flow cytometry as  
124 described previously.

#### 125 **Statistical analysis**

126 p-values were determined in GraphPad Prism 8 software using two tailed end t-test for samples  
127 with unequal variance.

128

129

a

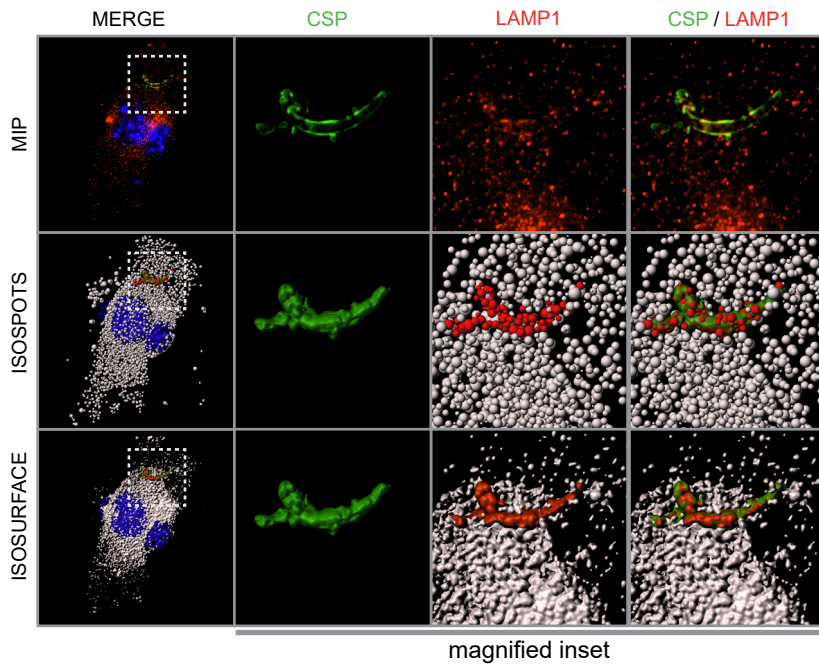

b

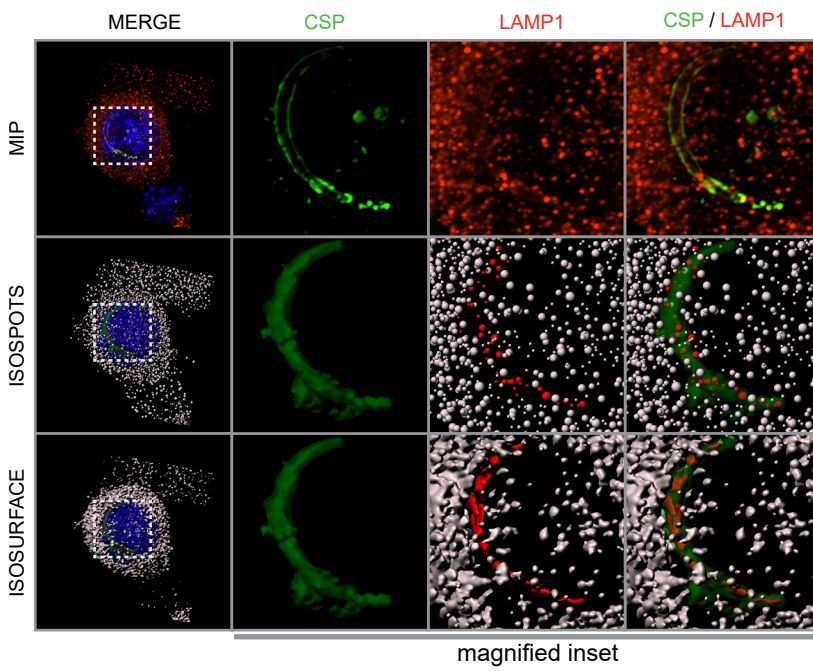



130 **Fig. S1. CT deficient or wild type *Plasmodium* sporozoites interacts with lysosomes in similar**  
131 **fashion.** Immunofluorescent microscopy of Hepa1-6 cells infected with SPECT2<sup>-</sup> *P. yoelii*  
132 sporozoites. Infection was assessed after (a) 5 or (b) 30 min and processed for fluorescence  
133 microscopy using DAPI (blue) for DNA, Phalloidin (white) for actin visualization, antibodies to  
134 LAMP1 (red) for LE/lysosomes and CSP (green) for parasites. Isospots for LE/lysosomes and  
135 isosurfaces for LE/lysosomes, parasites, host cell nucleus and plasma membrane were created  
136 using Imaris software and the LE/lysosomes interacting with parasites were identified by detecting  
137 overlap between isospots and the isosurface. Red spots represent LAMP1-positive structures co-  
138 localized with CSP. Magnified inset is 15  $\mu\text{m}$  x 15  $\mu\text{m}$ . Related to Figure 1.

139

140

141

142

143

144

145

146

147

148

a

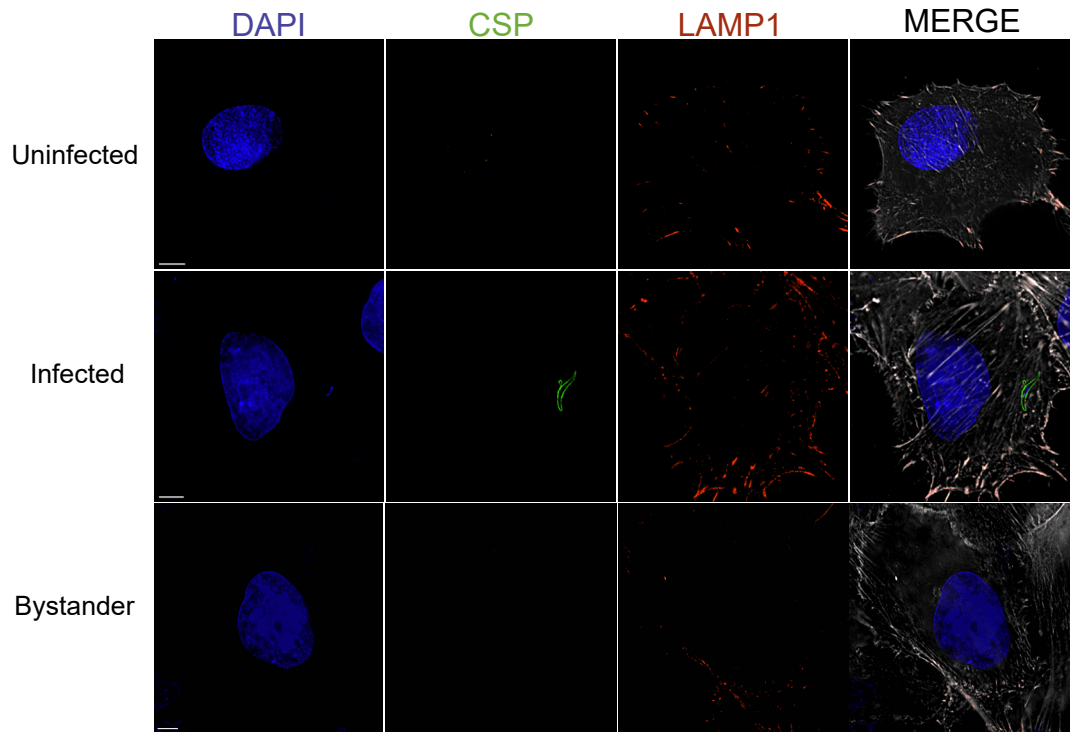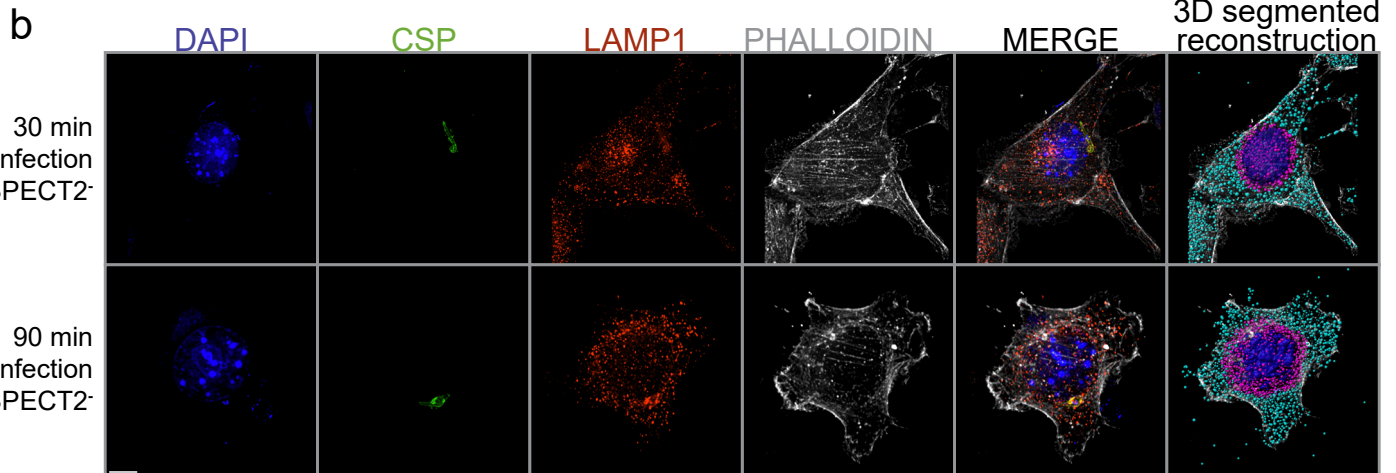

c

30 minutes

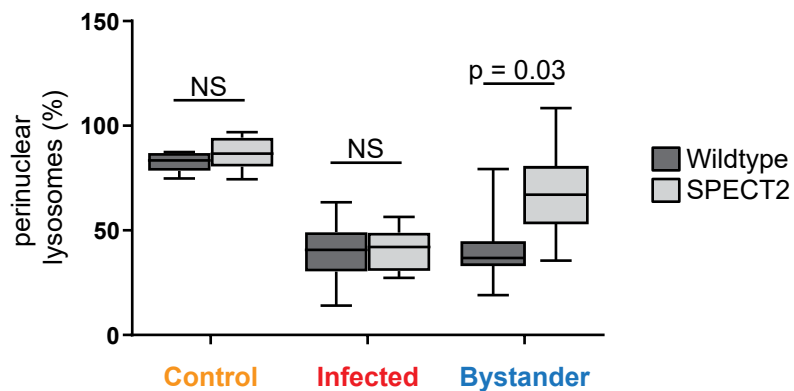

d

90 minutes

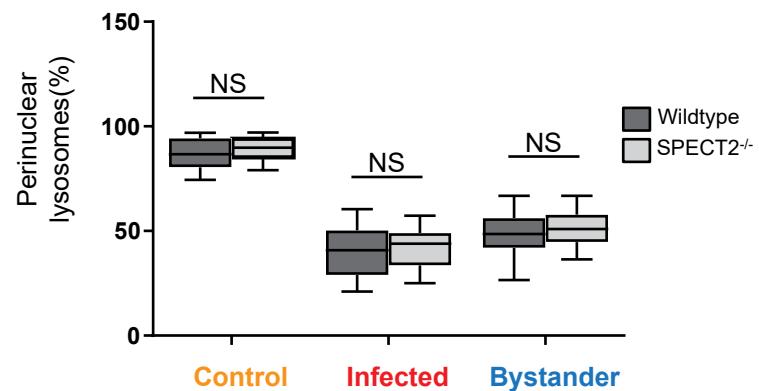

149 **Fig. S2. Sporozoite induced lysosome-plasma membrane fusion is independent of cell**  
150 **traversal. (a)** Hepa1-6 cells were infected with *P. yoelii* sporozoites and fixed after 90 min. Cells  
151 were stained with antibodies to LAMP1 prior to permeabilization and stained with DAPI (blue)  
152 for DNA, phalloidin (white) for actin visualization, antibodies to CSP (green) for parasites and  
153 displayed as maximum intensity projections. Bar = 5  $\mu$ m. **(b)** Hepa1-6 cells were infected with  
154 SPECT2<sup>-</sup> sporozoites and fixed after 30 and 90 min. Cells were processed for 3D fluorescence  
155 microscopy using DAPI (blue) for DNA, phalloidin (white) for actin visualization, antibodies to  
156 LAMP1 (red) for LE/lysosomes and CSP (green) for parasites and displayed as maximum intensity  
157 projections. Scale bar = 5  $\mu$ m. Images were obtained on a Deltavision fluorescence microscope and  
158 processed by Imaris software to construct isosurfaces (nuclei and parasite) and LAMP1-positive  
159 isospots (LE and lysosomes) by predefined algorithms for identification of surfaces and spots.  
160 Perinuclear isosurfaces were created by extrapolating the DAPI signal to define a perinuclear  
161 region where lysosomes could be differentially quantified. The isospots corresponding to total and  
162 perinuclear lysosomes were depicted in cyan and red, respectively. Bar = 5  $\mu$ m. **(c and d)** Values  
163 represented in box and whiskers plot correspond to lysosomes from total and perinuclear area  
164 represented as mean  $\pm$  SD of 25 different microscopic fields from three independent experiments.  
165 Related to Figure 2.

166

167

168

169

170

a

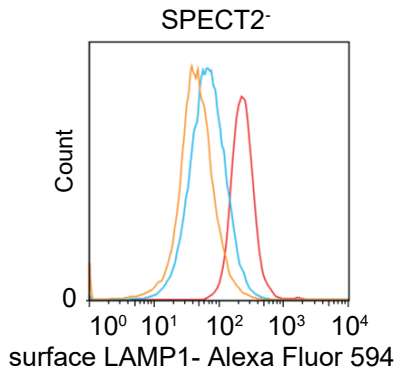

b

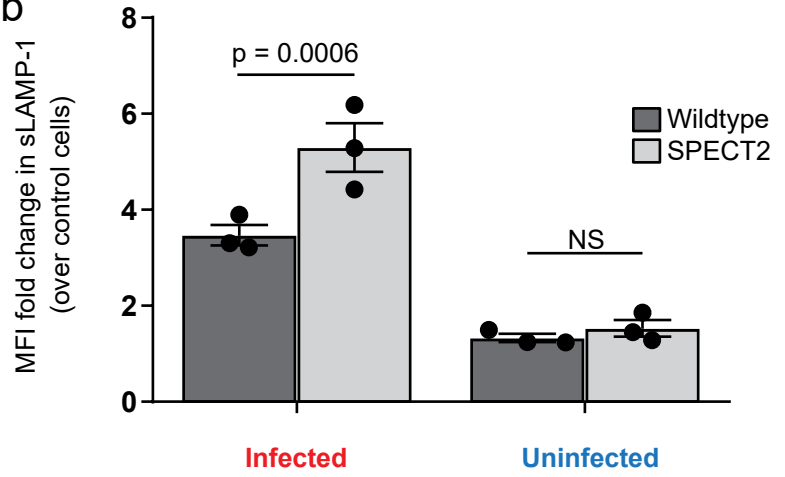

c

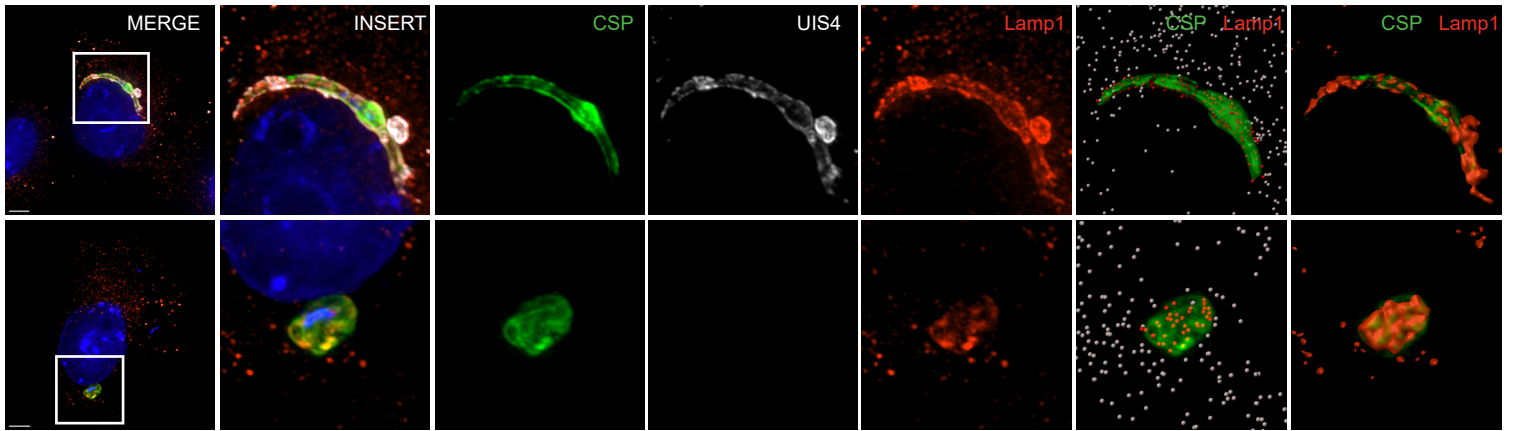

171 **Fig. S3. Sporozoite induced lysosome-plasma membrane fusion is independent of productive**  
172 **invasion. (a)** Hepa1-6 cells were infected with SPECT2<sup>-</sup> *P. yoelii* sporozoites for 90 min and  
173 analyzed by flow cytometry using antibodies specific to LAMP1 and CSP. Surface LAMP1 was  
174 evaluated by staining cells prior to permeabilization, while total LAMP1 was evaluated by staining  
175 for LAMP1 after permeabilization. The histogram shows the distribution of surface LAMP1 from  
176 SPECT2<sup>-</sup> infected, uninfected and unexposed control cells from one of three independent  
177 experiments. **(b)** Surface LAMP1 levels were compared between uninfected and SPECT2<sup>-</sup> infected  
178 cells as a fold change over control cells. The bar graph depicts the mean  $\pm$  the SD of three  
179 independent experiments. **(c)** Hepa1-6 cells were infected with *P. yoelii* sporozoites and fixed after  
180 90 min. Cells were stained with DAPI (blue) for nuclei visualization, antibodies to LAMP1 for  
181 lysosomes, UIS4 (white) and CSP (green) for parasite detection and displayed as maximum  
182 intensity projections. Bar = 5  $\mu$ m. Red spots represent LAMP1-positive structures co-localized  
183 with CSP. Magnified inset is 15  $\mu$ m x 15  $\mu$ m. Related to Figure 2.

184

185

186

187

188

189

190

191

**a**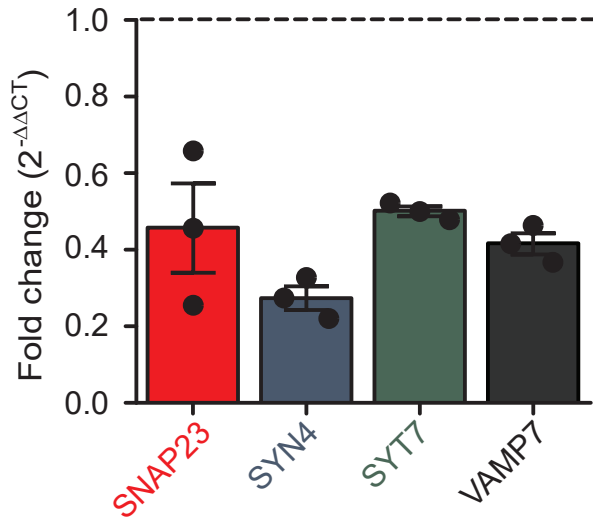**b**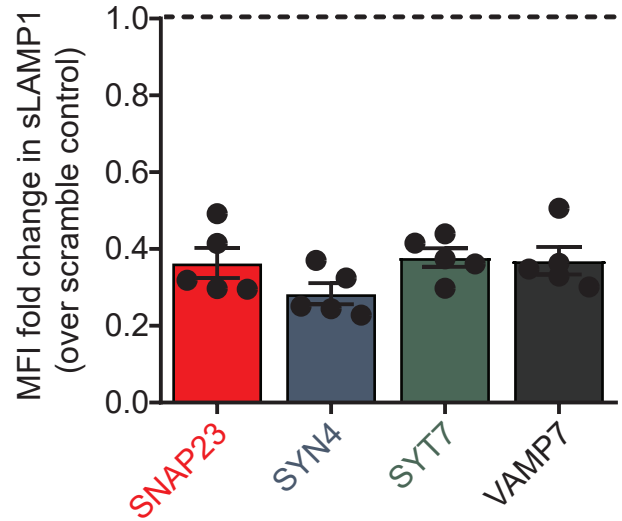**c**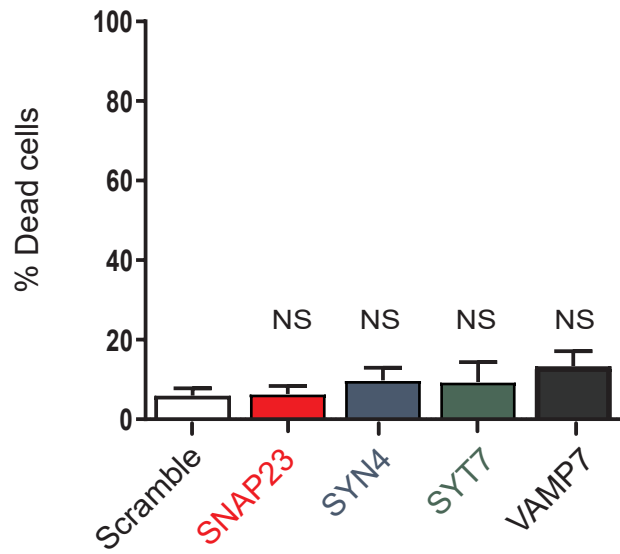**d**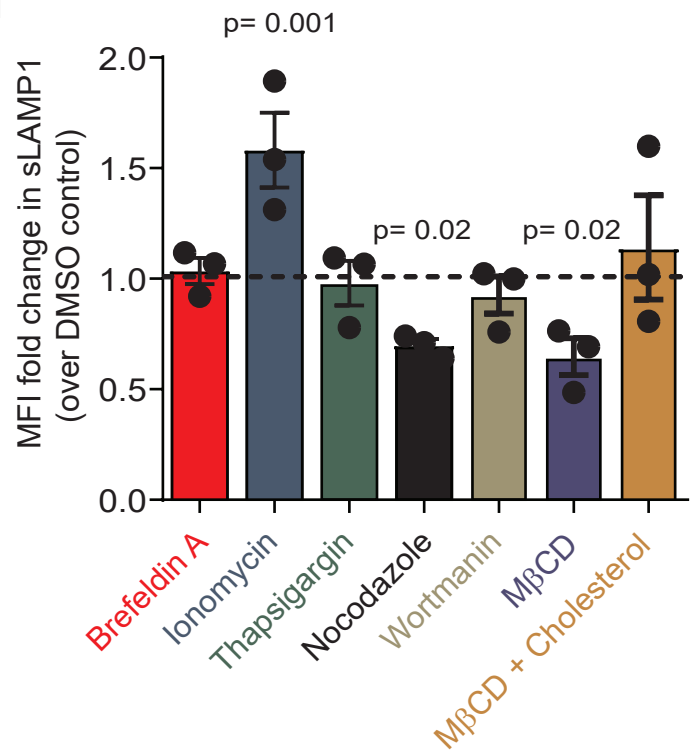

192 **Fig. S4. Selective knockdown of SNARE proteins can be achieved using lentivirus-mediated**  
193 **shRNA. (a)** Bar graph depicting relative gene knockdown compared to non-targeting control  
194 shRNA. Hepa 1-6 cells were transduced with lentivirus expressing shRNA constructs selectively  
195 targeting SNARE proteins, or a non-targeting control. Mean knockdown level was determined  
196 using qPCR. Values are normalized to non-targeting control which is indicated by solid black line.  
197 Data is mean  $\pm$  the SD of 3 independent experiments. **(b)** Hepa1-6 cells were transduced with  
198 shRNA lentiviruses against SNAP23, SYN4, SYT7, or VAMP7 or a scrambled control and  
199 assessed for surface LAMP1 by flow cytometry. Surface LAMP1 levels were compared between  
200 scramble and specific knockdowns and expressed as a fold change in mean fluorescent intensity  
201 (MFI). The bar graph depicts the mean  $\pm$  the SD of 5 independent experiments. **(c)** Hepa1-6 cells  
202 were transduced with shRNA lentiviruses against SNAP23, SYN4, SYT7, VAMP7 or a scrambled  
203 control and challenged with *P. yoelii* sporozoites for 90 min and stained with Live/Dead stain for  
204 30 mins before fixation. The bar graph displays the dead cell percentage in knockdowns  
205 normalized to scramble shRNA cells, indicated by dashed line following infection. **(d)** Hepa1-6  
206 cells were incubated with or without 10  $\mu$ M ionomycin, 400 nM thapsigargin, 10  $\mu$ M brefeldin A,  
207 10  $\mu$ M nocodazole, 5 mM methyl- $\beta$ -cyclodextrin (M $\beta$ CD) for 15 min, fixed and assessed for  
208 surface LAMP1 by flow cytometry. For cholesterol replenishment, methyl- $\beta$ -cyclodextrin  
209 (M $\beta$ CD) treated cells were incubated with 1 mM cholesterol for 15 min prior to fixation. Surface  
210 LAMP1 levels were compared between DMSO vehicle control and specific treatments and  
211 expressed as a fold change in mean fluorescent intensity (MFI). The bar graph depicts the mean  $\pm$   
212 the SD of three independent experiments. Related to Figure 3.

213

214

**a**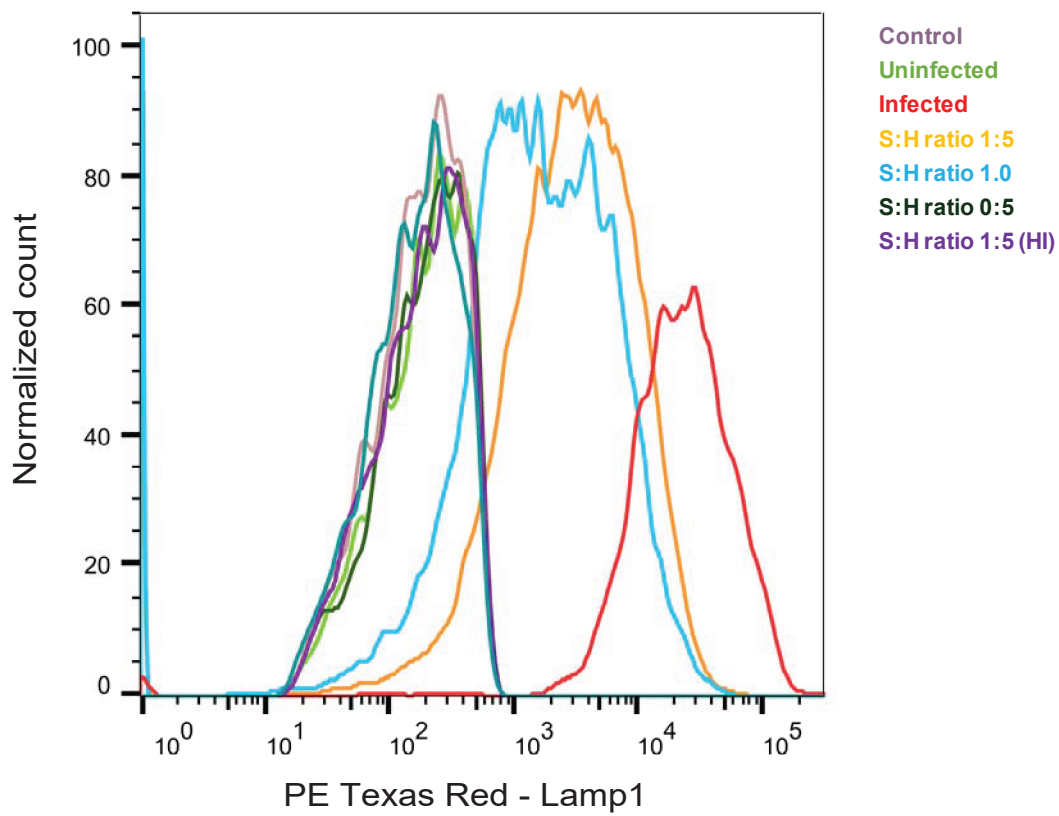



215 **Fig. S5. Sporozoite secreted factor(s) contribute to relocalisation of lysosomes.** Hepa1-6 cells  
216 were infected with *P. yoelii* sporozoites or exposed to sporozoite secretion-enriched supernatants.  
217 Surface LAMP1 was analyzed by flow cytometry. Histogram is representative of three  
218 independent experiments. Related to Figure 4.

219

220

221

222

223

224

225

226

227

228

229

230

231

232

233

234

235

236

237

238

239 **Supplementary Table 1**

240 Lysosomal trafficking modulators selected for the study. Related to Figure 3

| Inhibitor                     | Function                                                                                                                                    | Reference                                                 |
|-------------------------------|---------------------------------------------------------------------------------------------------------------------------------------------|-----------------------------------------------------------|
| Ionomycin                     | ionophore, increases intracellular Ca <sup>++</sup> and induces lysosome exocytosis.                                                        | (Xu et al., 2012)                                         |
| Brefeldin A                   | redistributes LE/lysosomes towards periphery                                                                                                | (Lippincott-Schwartz et al., 1991; Tardieux et al., 1992) |
| Nocodazole                    | a microtubule-depolymerizing agent, prevents lysosome redistribution.                                                                       | (Tardieux et al., 1992)                                   |
| Thapsigargin                  | inhibitor of the sarco/endoplasmic reticulum Ca <sup>++</sup> ATPase, elevates cytosolic Ca <sup>++</sup> and promotes lysosome exocytosis. | (Sivaramakrishnan et al., 2012)                           |
| Methyl- $\beta$ -cyclodextrin | depletes membrane cholesterol and reduces LAMP1 levels on surface.                                                                          | (Hissa et al., 2012)                                      |
| Wortmannin                    | PI3K inhibitor, inhibits various stages of endocytic network.                                                                               | (Sinnberg et al., 2009)                                   |

241

242

243

244

245

246

247

248

249

250

251 **References:**

252

Hissa, B., Duarte, J.G., Kelles, L.F., Santos, F.P., del Puerto, H.L., Gazzinelli-Guimaraes, P.H., de Paula, A.M., Agero, U., Mesquita, O.N., Guatimosim, C., *et al.* (2012). Membrane cholesterol regulates lysosome-plasma membrane fusion events and modulates *Trypanosoma cruzi* invasion of host cells. *PLoS neglected tropical diseases* *6*, e1583.

Lippincott-Schwartz, J., Yuan, L., Tipper, C., Amherdt, M., Orci, L., and Klausner, R.D. (1991). Brefeldin A's effects on endosomes, lysosomes, and the TGN suggest a general mechanism for regulating organelle structure and membrane traffic. *Cell* *67*, 601-616.

Real, F., and Mortara, R.A. (2012). The diverse and dynamic nature of *Leishmania* parasitophorous vacuoles studied by multidimensional imaging. *PLoS neglected tropical diseases* *6*, e1518.

Schenkman, S., Jiang, M.S., Hart, G.W., and Nussenzweig, V. (1991). A novel cell surface trans-sialidase of *Trypanosoma cruzi* generates a stage-specific epitope required for invasion of mammalian cells. *Cell* *65*, 1117-1125.

Sinnberg, T., Lasithiotakis, K., Niessner, H., Schitteck, B., Flaherty, K.T., Kulms, D., Maczey, E., Campos, M., Gogel, J., Garbe, C., *et al.* (2009). Inhibition of PI3K-AKT-mTOR signaling sensitizes melanoma cells to cisplatin and temozolomide. *J Invest Dermatol* *129*, 1500-1515.

Sivaramakrishnan, V., Bidula, S., Campwala, H., Katikaneni, D., and Fountain, S.J. (2012). Constitutive lysosome exocytosis releases ATP and engages P2Y receptors in human monocytes. *Journal of cell science* *125*, 4567-4575.

Tardieux, I., Webster, P., Ravesloot, J., Boron, W., Lunn, J.A., Heuser, J.E., and Andrews, N.W. (1992). Lysosome recruitment and fusion are early events required for trypanosome invasion of mammalian cells. *Cell* *71*, 1117-1130.

Xu, J., Toops, K.A., Diaz, F., Carvajal-Gonzalez, J.M., Gravotta, D., Mazzoni, F., Schreiner, R., Rodriguez-Boulan, E., and Lakkaraju, A. (2012). Mechanism of polarized lysosome exocytosis in epithelial cells. *Journal of cell science* *125*, 5937-5943.
